# Supplementary material for: An Enriched Environment Promotes Shelter-Seeking Behaviour and Survival of Hatchery-Produced Juvenile European Lobster (Homarus gammarus)
Source: PLoS One. 2016 Aug 25;11(8):e0159807. doi: 10.1371/journal.pone.0159807 (PMC4999228; doi:10.1371/journal.pone.0159807)
Supplement: S1 Table — Listed are the different categories used to compare lobster juvenile behaviour in the two treatments “naïve” and “exposed”. In the “naïve” treatment, the juveniles were raised in single compartments without substrate and shelter whereas juveniles in the “exposed” treatment experienced substrate, shelter and interactions with conspecifics. Individual lobster juveniles (ID) were tested at day 4, 21 and 42. Carapace length (CL) was measured at each test day. Time was recorded in seconds and total observation time was 1200 seconds. (XLSX) [file pone.0159807.s001.xlsx]

## Sheet: Sheet1
Nr	Test day	Date	Lobster ID	Treatment	CL (mm)	Shelter seek	Found	Accept	Time to find shelter	Time to accept	Time roaming	Number of shuffles inside shelter	Time spent digging into shelter	Time spent digging outside shelter	Number of times climbing	Time spent freezing	Time spent in shelter	Activity in shelter (shuf/min)	Climbing frequency (roaming/climbing)
1	4	28-29\5-11	CA1	naïve	14.1	1	1	1	272	560	479	15	84	NA	NA	NA	637	1.41287	NA
2	4	28-29\5-11	CA4	naïve	12.3	1	0	0	1200	1200	226	NA	NA	974	5	NA	NA	NA	0.0221239
3	4	28-29\5-11	CA3	naïve	14.5	1	1	1	72	870	262	13	598	NA	NA	10	330	2.36364	NA
4	4	28-29\5-11	CA5	naïve	15.4	1	1	1	60	409	186	29	225	NA	NA	NA	789	2.20532	NA
5	4	28-29\5-11	CB1	naïve	16	1	1	0	60	1200	236	NA	NA	964	NA	NA	NA	NA	NA
6	4	28-29\5-11	UA1	exposed	15.8	1	1	0	27	1200	475	NA	NA	725	1	NA	NA	NA	0.00210526
7	4	28-29\5-11	UA3	exposed	13.7	0	0	0	1200	1200	540	NA	NA	NA	NA	660	NA	NA	NA
8	4	28-29\5-11	UA5	exposed	15.2	1	1	0	240	1200	1066	NA	NA	134	10	NA	NA	NA	0.00938086
9	4	28-29\5-11	UA7	exposed	15.2	1	0	0	1200	1200	330	NA	NA	870	3	NA	NA	NA	0.00909091
10	4	28-29\5-11	UB2	exposed	14.9	0	1	0	15	1200	940	NA	NA	NA	NA	260	NA	NA	NA
11	4	28-29\5-11	CA2	naïve	12.5	0	1	1	87	148	142	10	8	NA	NA	NA	1050	0.571429	NA
12	4	28-29\5-11	CA7	naïve	15.6	1	0	0	1200	1200	203	NA	NA	997	NA	NA	NA	NA	NA
13	4	28-29\5-11	CA6	naïve	15.6	1	1	0	53	1200	790	NA	NA	410	1	NA	NA	NA	0.00126582
14	4	28-29\5-11	CB2	naïve	14.3	1	1	0	32	1200	577	NA	NA	623	12	NA	NA	NA	0.0207972
15	4	28-29\5-11	CB3	naïve	14.4	1	1	1	35	791	467	13	143	181	NA	NA	409	1.90709	NA
16	4	28-29\5-11	UA2	exposed	14.9	0	1	0	378	1200	609	NA	NA	NA	NA	591	NA	NA	NA
17	4	28-29\5-11	UA4	exposed	14.1	1	1	0	107	1200	771	NA	NA	402	1	27	NA	NA	0.00129702
18	4	28-29\5-11	UA6	exposed	14.4	0	0	0	1200	1200	1114	NA	NA	NA	2	86	NA	NA	0.00179533
19	4	28-29\5-11	UB1	exposed	13.9	1	1	0	245	1200	1021	NA	NA	179	NA	NA	NA	NA	NA
20	4	28-29\5-11	UB3	exposed	15.7	0	1	0	850	1200	868	NA	59	NA	NA	273	0	NA	NA
21	4	28-29\5-11	UB4	exposed	13.6	1	1	0	230	1200	591	NA	NA	609	NA	NA	NA	NA	NA
22	4	28-29\5-11	UB6	exposed	14.4	1	1	1	26	551	583	22	20	NA	1	NA	597	2.21106	0.00171527
23	4	28-29\5-11	UC1	exposed	14.8	1	1	1	268	432	327	38	105	NA	NA	NA	768	2.96875	NA
24	4	28-29\5-11	UC3	exposed	12.9	0	1	0	124	1200	1200	NA	NA	NA	3	NA	NA	NA	0.0025
25	4	28-29\5-11	UC5	exposed	15	1	1	1	306	1059	1151	0	134	NA	NA	NA	49	0	NA
26	4	28-29\5-11	UC7	exposed	16	1	1	0	41	1200	639	NA	NA	561	2	NA	NA	NA	0.00312989
27	4	28-29\5-11	CB5	naïve	16.7	1	1	1	48	304	175	30	129	NA	NA	NA	896	2.00893	NA
28	4	28-29\5-11	CB6	naïve	15	0	1	0	265	1200	1200	NA	NA	NA	NA	NA	NA	NA	NA
29	4	28-29\5-11	CC2	naïve	14.2	1	1	1	180	233	210	33	37	NA	NA	NA	953	2.07765	NA
30	4	28-29\5-11	CC3	naïve	15.1	1	1	0	94	1200	237	NA	NA	963	NA	NA	NA	NA	NA
31	4	28-29\5-11	CC4	naïve	12.3	1	1	1	66	541	204	41	337	NA	NA	NA	659	3.73293	NA
32	4	28-29\5-11	UB5	exposed	12.3	0	1	0	316	1200	1068	NA	NA	NA	5	132	NA	NA	0.00468165
33	4	28-29\5-11	UB7	exposed	15	1	1	1	111	924	841	16	83	NA	1	NA	276	3.47826	0.00118906
34	4	28-29\5-11	UC2	exposed	15.5	0	1	0	22	1200	1200	NA	NA	NA	7	NA	NA	NA	0.00583333
35	4	28-29\5-11	UC4	exposed	15.7	0	1	0	758	1200	1166	NA	NA	NA	NA	34	NA	NA	NA
36	4	28-29\5-11	UC6	exposed	15.7	1	1	0	119	1200	1118	NA	NA	82	5	NA	NA	NA	0.00447227
37	4	28-29\5-11	CB4	naïve	15.9	1	1	0	13	1200	204	NA	NA	996	1	NA	NA	NA	0.00490196
38	4	28-29\5-11	CB7	naïve	14.7	1	1	0	135	1200	329	NA	NA	871	NA	NA	NA	NA	NA
39	4	28-29\5-11	CC1	naïve	13.9	1	1	0	83	1200	300	NA	NA	900	NA	NA	NA	NA	NA
40	4	28-29\5-11	CC5	naïve	11.2	1	0	0	1200	1200	101	NA	NA	1099	NA	NA	NA	NA	NA
41	4	28-29\5-11	CC7	naïve	14	1	1	1	203	411	301	43	110	NA	NA	NA	789	3.26996	NA
42	4	28-29\5-11	CC6	naïve	14.9	1	0	0	1200	1200	505	NA	NA	695	4	NA	NA	NA	0.00792079
43	21	14-15/6-11	UC8	exposed	14.8	1	1	1	47	609	557	31	52	NA	1	NA	591	3.14721	0.00179533
44	21	14-15/6-11	UC10	exposed	14.8	0	1	0	142	1200	1200	NA	NA	NA	5	NA	NA	NA	0.00416667
45	21	14-15/6-11	UC12	exposed	12.4	0	1	0	111	1200	1200	NA	NA	NA	4	NA	NA	NA	0.00333333
46	21	14-15/6-11	UC14	exposed	15.2	1	1	0	91	1200	777	NA	NA	424	10	NA	NA	NA	0.01287
47	21	14-15/6-11	UB9	exposed	15	1	1	1	119	216	185	35	31	NA	NA	32	952	2.20588	NA
48	21	14-15/6-11	CC8	naïve	13.8	1	1	1	27	607	451	24	88	71	7	NA	590	2.44068	0.0155211
49	21	14-15/6-11	CC10	naïve	14.6	1	1	0	14	1200	629	NA	NA	571	9	NA	NA	NA	0.0143084
50	21	14-15/6-11	CC12	naïve	16	1	1	1	36	987	879	16	108	NA	19	NA	213	4.50704	0.0216155
51	21	14-15/6-11	CC14	naïve	13.8	0	1	0	64	1200	1200	NA	NA	NA	17	NA	NA	NA	0.0141667
52	21	14-15/6-11	CB9	naïve	14.7	1	1	1	231	252	584	13	17	NA	2	NA	599	1.30217	0.00342466
53	21	14-15/6-11	UC9	exposed	15.9	1	1	1	19	875	836	15	39	NA	3	NA	325	2.76923	0.00358852
54	21	14-15/6-11	UC11	exposed	12.7	1	1	1	13	41	28	27	13	NA	NA	NA	1159	1.39776	NA
55	21	14-15/6-11	UC13	exposed	15.1	1	1	1	85	307	267	21	17	NA	NA	23	893	1.41097	NA
56	21	14-15/6-11	UB8	exposed	14.4	1	0	0	1200	1200	642	NA	NA	490	4	68	NA	NA	0.00623053
57	21	14-15/6-11	UB10	exposed	13.3	1	1	0	1000	1200	509	NA	NA	666	2	25	NA	NA	0.00392927
58	21	14-15/6-11	CC9	naïve	14.2	1	1	1	104	216	166	30	50	NA	NA	NA	984	1.82927	NA
59	21	14-15/6-11	CC11	naïve	13	1	1	1	95	347	167	4	180	NA	NA	NA	853	0.28136	NA
60	21	14-15/6-11	CC13	naïve	16.7	1	1	1	76	94	82	22	12	NA	1	NA	1106	1.19349	0.0121951
61	21	14-15/6-11	CB8	naïve	14.8	1	1	0	579	1200	416	NA	NA	784	3	NA	NA	NA	0.00721154
62	21	14-15/6-11	CB10	naïve	13	1	1	0	211	1200	348	NA	NA	852	NA	NA	NA	NA	NA
63	21	14-15/6-11	CB11	naïve	14.1	1	1	1	173	318	288	27	30	NA	NA	NA	882	1.83673	NA
64	21	14-15/6-11	CB13	naïve	14.3	1	1	1	360	754	619	15	135	NA	1	NA	446	2.01794	0.00161551
65	21	14-15/6-11	CA8	naïve	15.2	1	1	0	254	1200	548	NA	NA	652	8	NA	NA	NA	0.0145985
66	21	14-15/6-11	CA10	naïve	14.8	1	1	0	154	1200	715	NA	NA	485	9	NA	NA	NA	0.0125874
67	21	14-15/6-11	CA12	naïve	14	1	1	0	180	1200	466	NA	NA	734	1	NA	NA	NA	0.00214592
68	21	14-15/6-11	CA14	naïve	14.9	1	1	1	84	816	705	24	111	NA	10	NA	384	3.75	0.0141844
69	21	14-15/6-11	UB12	exposed	13.4	1	1	1	124	510	362	30	28	NA	3	NA	690	2.6087	0.00828729
70	21	14-15/6-11	UB14	exposed	13.2	1	1	1	62	136	133	17	3	NA	NA	NA	1004	1.01594	NA
71	21	14-15/6-11	UA9	exposed	13.3	0	1	0	62	1200	1200	NA	NA	NA	4	NA	NA	NA	0.00333333
72	21	14-15/6-11	UA11	exposed	13.4	1	1	0	168	1200	243	NA	NA	957	NA	NA	NA	NA	NA
73	21	14-15/6-11	UA13	exposed	14	1	1	1	414	614	445	23	59	NA	NA	100	596	2.31544	NA
74	21	14-15/6-11	CB12	naïve	14.8	1	1	1	171	190	184	5	6	NA	NA	NA	1010	0.29703	NA
75	21	14-15/6-11	CB14	naïve	15.1	1	1	1	56	67	61	15	6	NA	NA	NA	1133	0.794351	NA
76	21	14-15/6-11	CA9	naïve	13.6	1	1	1	63	66	63	21	3	NA	NA	NA	1134	1.11111	NA
77	21	14-15/6-11	CA11	naïve	13.2	1	1	1	136	156	140	6	16	NA	NA	NA	1044	0.344828	NA
78	21	14-15/6-11	CA13	naïve	14.3	1	1	1	67	321	315	16	6	NA	1	NA	879	1.09215	0.0031746
79	21	14-15/6-11	UB11	exposed	15.3	1	1	1	33	327	305	14	22	NA	NA	NA	873	0.962199	NA
80	21	14-15/6-11	UB13	exposed	16.1	0	1	0	27	1200	1129	NA	NA	NA	3	71	NA	NA	0.00265722
81	21	14-15/6-11	UA8	exposed	15.3	1	1	1	74	309	407	12	8	NA	NA	NA	785	0.917197	NA
82	21	14-15/6-11	UA10	exposed	13.7	1	1	1	75	84	77	9	7	NA	NA	NA	1116	0.483871	NA
83	21	14-15/6-11	UA12	exposed	15.2	1	1	1	11	37	16	23	21	NA	NA	NA	1163	1.18659	NA
84	21	14-15/6-11	UA14	exposed	15	1	1	1	72	92	79	21	13	NA	NA	NA	1108	1.13718	NA
85	42	5-6/7-11	UC22	exposed	13.5	1	1	1	61	335	325	2	10	NA	NA	NA	845	0.142012	NA
86	42	5-6/7-11	UC17	exposed	13.5	1	1	1	79	92	80	8	12	NA	NA	NA	1108	0.433213	NA
87	42	5-6/7-11	UC19	exposed	15.4	0	1	0	13	1200	1200	NA	NA	NA	2	NA	NA	NA	0.00166667
88	42	5-6/7-11	UC21	exposed	15.4	1	1	0	8	1200	534	NA	NA	666	2	NA	NA	NA	0.00374532
89	42	5-6/7-11	UB16	exposed	15.4	0	1	0	15	1200	1200	NA	NA	NA	12	NA	NA	NA	0.01
90	42	5-6/7-11	UB18	exposed	14	1	1	1	32	754	567	14	187	NA	NA	NA	446	1.88341	NA
91	42	5-6/7-11	CC16	naïve	15.6	1	1	1	51	1001	600	18	401	NA	1	NA	199	5.42714	0.00166667
92	42	5-6/7-11	CC18	naïve	15.6	1	1	0	49	1200	307	NA	NA	893	NA	NA	NA	NA	NA
93	42	5-6/7-11	CC20	naïve	15.4	1	1	1	23	366	337	0	29	NA	1	NA	834	0	0.00296736
94	42	5-6/7-11	CB15	naïve	14.8	0	1	0	824	1200	1087	NA	NA	NA	NA	113	NA	NA	NA
95	42	5-6/7-11	UC23	exposed	13	1	0	0	1200	1200	560	NA	NA	562	NA	78	NA	NA	NA
96	42	5-6/7-11	UC18	exposed	17.7	1	1	1	21	126	103	2	23	NA	NA	NA	1074	0.111732	NA
97	42	5-6/7-11	UC20	exposed	15.6	1	1	1	333	374	356	22	18	NA	NA	NA	826	1.59806	NA
98	42	5-6/7-11	UB15	exposed	16.6	1	1	1	35	814	621	0	106	87	2	NA	386	0	0.00322061
99	42	5-6/7-11	UB17	exposed	14.2	1	1	0	57	1200	722	NA	NA	478	1	NA	NA	NA	0.00138504
100	42	5-6/7-11	CC15	naïve	13	1	1	1	74	522	451	20	71	NA	1	NA	678	1.76991	0.00221729
101	42	5-6/7-11	CC17	naïve	16	1	1	0	23	1200	727	NA	NA	459	NA	14	NA	NA	NA
102	42	5-6/7-11	CC19	naïve	15.1	1	1	1	24	47	116	21	14	NA	NA	NA	1070	1.17757	NA
103	42	5-6/7-11	CC21	naïve	14.5	1	1	1	9	532	515	13	17	NA	NA	NA	668	1.16766	NA
104	42	5-6/7-11	CB16	naïve	13.6	1	1	1	32	316	165	23	151	NA	1	NA	884	1.56109	0.00606061
105	42	5-6/7-11	CB17	naïve	15.2	1	1	1	25	933	581	23	64	288	4	NA	267	5.16854	0.00688468
106	42	5-6/7-11	CB19	naïve	15.1	1	1	1	24	555	329	29	226	NA	5	NA	645	2.69767	0.0151976
107	42	5-6/7-11	CB21	naïve	14.1	1	1	1	80	228	174	30	54	NA	NA	NA	972	1.85185	NA
108	42	5-6/7-11	CA16	naïve	17.1	1	1	0	56	1200	1057	NA	NA	143	6	NA	NA	NA	0.00567644
109	42	5-6/7-11	CA18	naïve	15.6	1	1	1	40	885	790	22	95	NA	8	NA	315	4.19048	0.0101266
110	42	5-6/7-11	CA20	naïve	15.6	1	1	1	35	938	867	23	71	NA	17	NA	262	5.26718	0.0196078
111	42	5-6/7-11	UB19	exposed	13.1	1	1	1	61	267	244	50	23	NA	NA	NA	933	3.21543	NA
112	42	5-6/7-11	UB21	exposed	13.7	1	1	1	33	57	36	26	21	NA	NA	NA	1143	1.36483	NA
113	42	5-6/7-11	UA16	exposed	15.3	0	1	0	164	1200	1093	0	107	NA	4	NA	0	NA	0.00365965
114	42	5-6/7-11	UA18	exposed	14.9	0	1	0	71	1200	1200	NA	NA	NA	NA	NA	NA	NA	NA
115	42	5-6/7-11	UA20	exposed	16.8	1	1	1	142	320	286	34	34	NA	NA	NA	880	2.31818	NA
116	42	5-6/7-11	CB18	naïve	14	1	1	1	78	227	196	27	91	NA	NA	NA	913	1.77437	NA
117	42	5-6/7-11	CB20	naïve	13.6	1	1	1	28	201	189	32	12	NA	NA	NA	999	1.92192	NA
118	42	5-6/7-11	CA15	naïve	13.7	0	1	0	173	1200	1048	NA	57	NA	7	NA	95	NA	0.00667939
119	42	5-6/7-11	CA17	naïve	15.3	1	1	1	117	372	362	5	10	NA	2	NA	828	0.362319	0.00552486
120	42	5-6/7-11	CA19	naïve	13.4	1	1	1	367	379	372	20	7	NA	5	NA	821	1.46163	0.0134409
121	42	5-6/7-11	CA21	naïve	14.3	1	1	1	11	205	570	23	8	NA	6	NA	622	2.21865	0.0105263
122	42	5-6/7-11	UB20	exposed	14.7	1	1	1	10	23	11	13	12	NA	NA	NA	1177	0.662702	NA
123	42	5-6/7-11	UA15	exposed	15.2	1	1	1	10	83	64	11	19	NA	NA	NA	1117	0.590868	NA
124	42	5-6/7-11	UA17	exposed	15.2	1	1	1	38	142	125	18	17	NA	NA	NA	1058	1.02079	NA
125	42	5-6/7-11	UA19	exposed	14.8	1	1	1	49	100	86	0	14	NA	NA	NA	1100	0	NA
126	42	5-6/7-11	UA21	exposed	16.6	1	1	1	447	944	631	8	27	286	NA	NA	256	1.875	NA
